# Supplementary material for: Electrochemical and spectroscopic characterisation of organic molecules with high positive redox potentials for energy storage in aqueous flow cells
Source: Royal Society of Chemistry journal article supplement (doi:10.1039/d4ya00366g), 2024-01-01
Supplement: d4ya00366g1.pdf [file d4ya00366g1.pdf]

## Supporting Information for

# Electrochemical and Spectroscopic Characterisation of Organic Molecules with High Positive Redox Potentials for Energy Storage in Aqueous Flow Cells

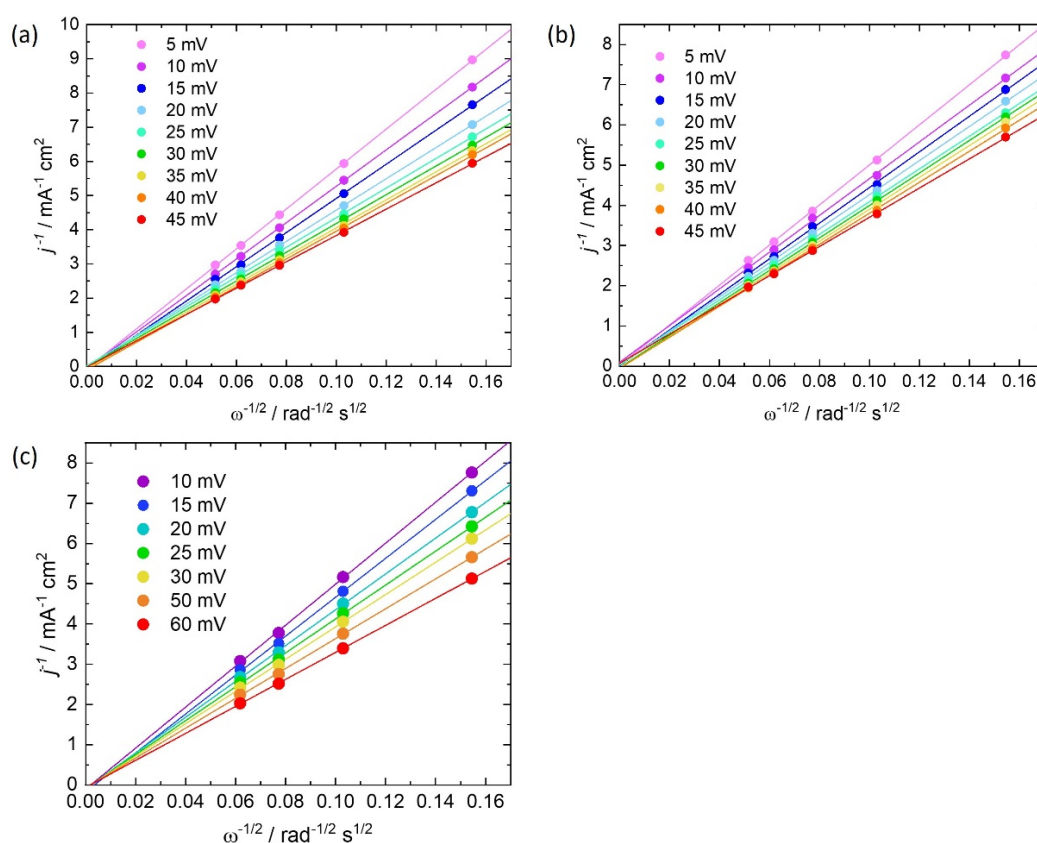

Figure S1: Koutechy-Levich analysis of (a-b) 1 mM ABTS / 1 M HClO<sub>4</sub> and (c) CPZ in 1 M H<sub>2</sub>SO<sub>4</sub>

Intercepts in Figure S1 are all  $< 0.1 \text{ mA}^{-1} \text{ cm}^2$ , hence a minimum kinetic current density of  $10 \text{ mA cm}^{-2}$ .

|                                                 | $E_0$ vs SHE / V | Supporting Electrolyte                             | z | c / M | $E_V$ / Wh dm <sup>-3</sup> | k / cm s <sup>-1</sup> | D / 10 <sup>-6</sup> cm <sup>2</sup> s <sup>-1</sup> | $(D/D(Fe^{2+}))^{2/3}$ | $k_m$ / 10 <sup>-4</sup> cm s <sup>-1</sup> | $k_{composite}$ / 10 <sup>-4</sup> cm s <sup>-1</sup> | P / W cm <sup>-2</sup> | Ref. |
|-------------------------------------------------|------------------|----------------------------------------------------|---|-------|-----------------------------|------------------------|------------------------------------------------------|------------------------|---------------------------------------------|-------------------------------------------------------|------------------------|------|
| 4,4'-BPTS                                       | 0.92             | 1 M H <sub>2</sub> SO <sub>4</sub>                 | 2 | 1.1   | 54.25                       | 1.12E-04               | 1.84                                                 | 0.4246                 | 5.96                                        | 0.943                                                 | 0.0184                 | 1    |
| BQDS                                            | 0.85             | 1 M H <sub>2</sub> SO <sub>4</sub>                 | 2 | 0.65  | 29.62                       | 1.55E-04               | 3.80                                                 | 0.6886                 | 9.66                                        | 1.336                                                 | 0.0351                 | 2    |
| DHBS                                            | 0.71             | 1 M H <sub>2</sub> SO <sub>4</sub>                 | 2 | 0.8   | 30.45                       | 5.52E-04               | 4.28                                                 | 0.7454                 | 10.5                                        | 3.613                                                 | 0.0396                 | 3    |
| DHDMBS                                          | 0.82             | 1 M H <sub>2</sub> SO <sub>4</sub>                 | 2 | 2     | 87.91                       | 1.30E-04               | 4.12                                                 | 0.7267                 | 10.2                                        | 1.153                                                 | 0.0365                 | 4    |
| Fe <sub>2</sub> (SO <sub>4</sub> ) <sub>3</sub> | 0.77             | [Fe <sub>2</sub> (SO <sub>4</sub> ) <sub>3</sub> ] | 1 | 1.4   | 28.89                       | 1.60E-03               | 3.76                                                 | 0.6838                 | 9.59                                        | 5.997                                                 | 0.0624                 | 5    |
| FeCl <sub>3</sub>                               | 0.77             | [FeCl <sub>3</sub> ]                               | 1 | 0.8   | 16.51                       | 1.60E-03               | 6.65                                                 | 1                      | 14.0                                        | 7.475                                                 | 0.0444                 | 6, 7 |
| VO <sup>2+</sup> /VO <sub>2</sub> <sup>+</sup>  | 1.00             | 1 M H <sub>2</sub> SO <sub>4</sub>                 | 1 | 1     | 26.80                       | 6.80E-05               | 2.80                                                 | 0.5618                 | 7.88                                        | 0.626E                                                | 0.00604                | 8    |
| MB (1 M)                                        | 0.52             | 1 M H <sub>2</sub> SO <sub>4</sub>                 | 2 | 1     | 27.87                       | 8.65E-03               | 2.69                                                 | 0.5473                 | 7.68                                        | 7.052                                                 | 0.0708                 | 9    |
| MB                                              | 0.52             | 1 M H <sub>2</sub> SO <sub>4</sub>                 | 2 | 1.2   | 33.45                       | 8.65E-03               | 2.69                                                 | 0.5473                 | 7.68                                        | 7.052                                                 | 0.0849                 | 9    |
| ABTS'                                           | 0.78             | 1 M HClO <sub>4</sub>                              | 1 | 1     | 20.91                       |                        | 3.34                                                 | 0.6314                 | 8.86                                        | 8.859                                                 | 0.0667                 |      |
| ABTS''                                          | 1.08             | 1 M HClO <sub>4</sub>                              | 1 | 1     | 28.95                       |                        | 3.29                                                 | 0.6249                 | 8.77                                        | 8.767                                                 | 0.0914                 |      |
| CPZ                                             | 0.802            | 1 M H <sub>2</sub> SO <sub>4</sub>                 | 1 | 1     | 21.49                       |                        | 4.50                                                 | 0.7709                 | 10.8                                        | 10.82                                                 | 0.0837                 |      |
| TMB                                             | 0.829            | 1 M H <sub>2</sub> SO <sub>4</sub>                 | 2 | 1     | 44.44                       | 9.43E-03               | 4.77                                                 | 0.8010                 | 11.2                                        | 10.04                                                 | 0.1606                 |      |
| NHPI                                            | 1.34             | 1 M H <sub>2</sub> SO <sub>4</sub>                 | 1 | 1     | 35.91                       | 1.96E-02               | 6.67                                                 | 1.0024                 | 14.1                                        | 13.12                                                 | 0.1697                 |      |
| VIO                                             | 1.158            | 1 M H <sub>2</sub> SO <sub>4</sub>                 | 1 | 1     | 31.04                       | 2.83E-02               | 5.75                                                 | 0.9073                 | 12.7                                        | 12.18                                                 | 0.1361                 |      |

Table S1: Experimentally determined electrochemical parameters and hypothetical figures of merit for FB positive electrolyte.

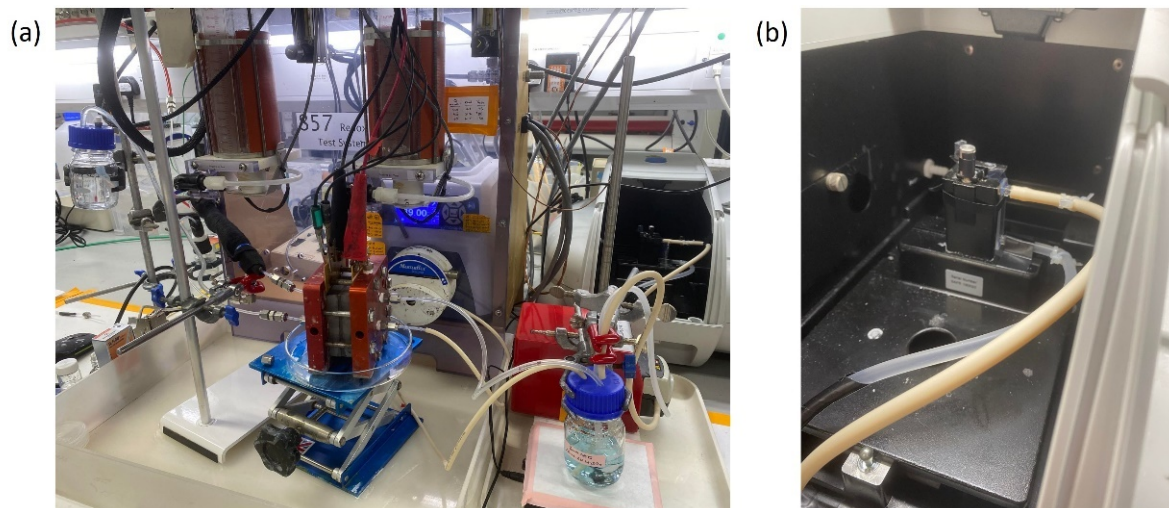

Figure S2: (a) Photograph of RFC experimental setup and (b) closer view of the in-operando UV-Vis flow-through cuvette in the photospectrometer (lid closed when running).

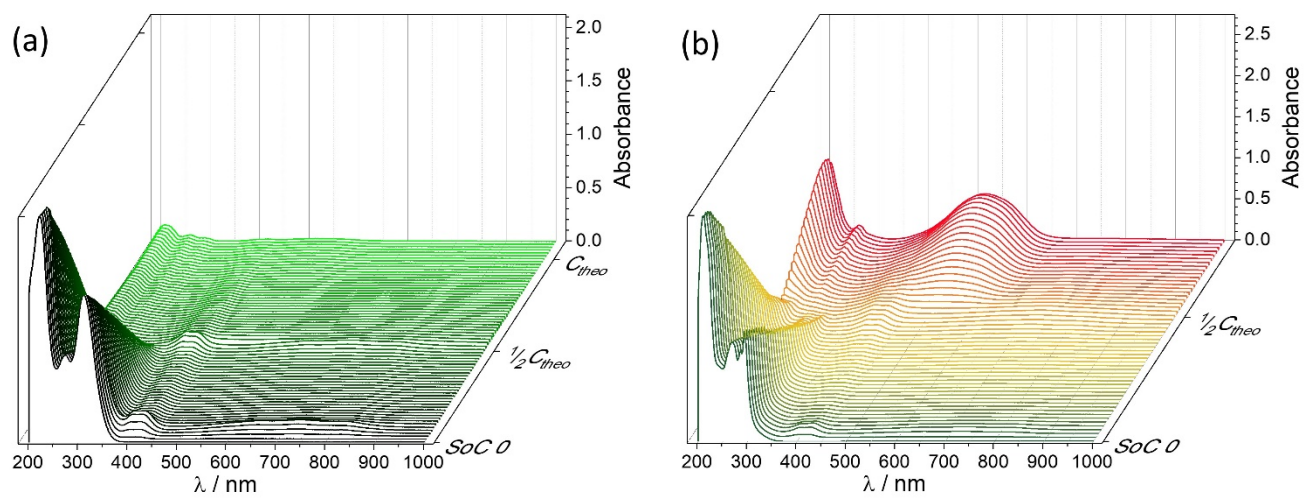

Figure S3: Waterfall plots of UV-Vis absorption spectra (1 scan  $\text{min}^{-1}$ ) during charging process of 5 mM ABTS in (a) 1 M HClO<sub>4</sub> and (b) 6 M H<sub>2</sub>SO<sub>4</sub>

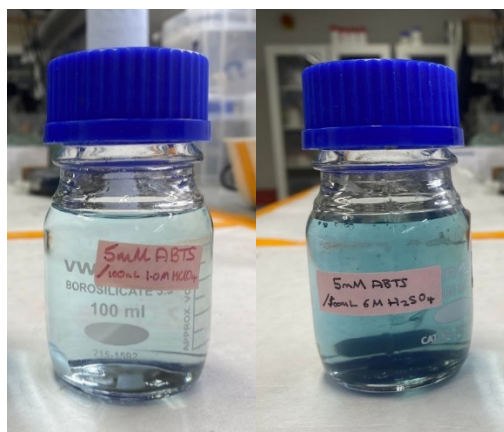

Figure S4: 100 mL electrolyte samples of ABTS in 1 M HClO<sub>4</sub> (left) and 6 M H<sub>2</sub>SO<sub>4</sub> (right). The 6 M H<sub>2</sub>SO<sub>4</sub> sample shows a dark blue precipitate.

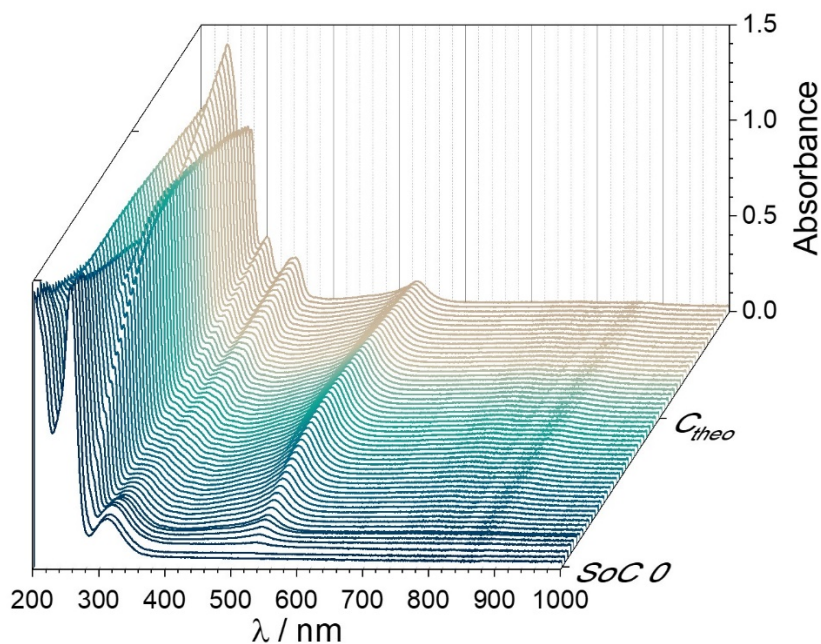

Figure S5: Waterfall plot of UV-Vis absorption spectra ( $1 \text{ scan min}^{-1}$ ) during charging process of 5 mM CPZ

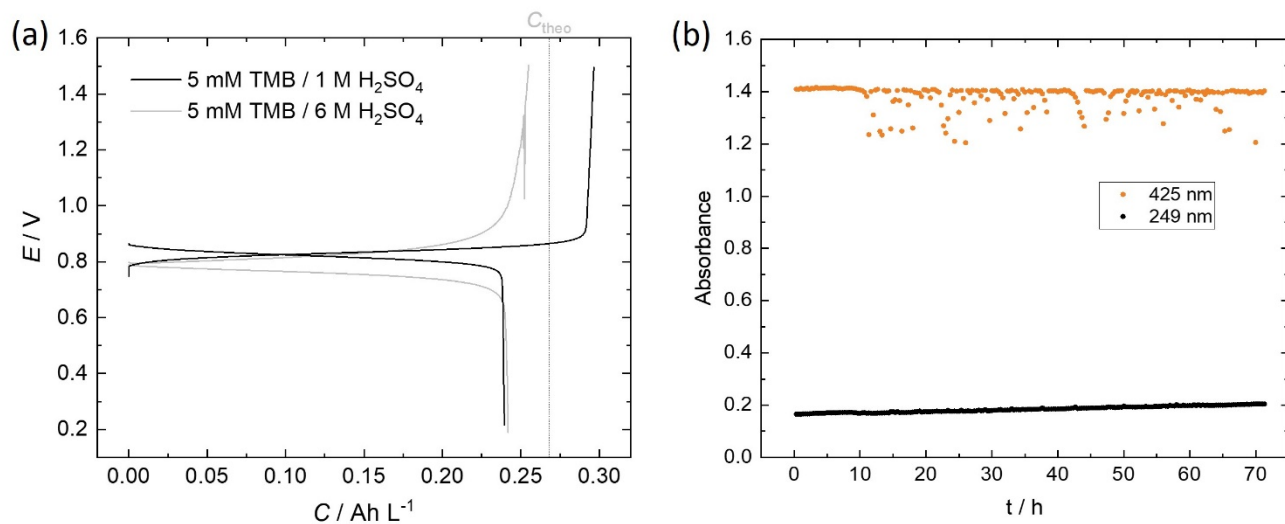

Figure S6: (a)  $E$  vs  $C$  cycle profiles of 5 mM TMB in 1 M  $\text{H}_2\text{SO}_4$  at SoC 1 with a 5 min open-circuit potential (OCP) and in 6 M  $\text{H}_2\text{SO}_4$  at SoC 1 with a 72 h OCP and (b) magnitude of absorbance at both 249 and 425 nm during a 72 h OCP at SoC 1 during a cycle of 5 mM TMB in 6 M  $\text{H}_2\text{SO}_4$ .

The solubility of ABTS in 1 M  $\text{HClO}_4$  was not determined due to the requirement to saturate a relatively strong perchlorate solution with a dehydrating agent. The saturation point of CPZ was not obvious by the presence of undissolved solid, but formed a gel-like liquid, with a CPZ concentration that appeared to plateau with increasing solid added.

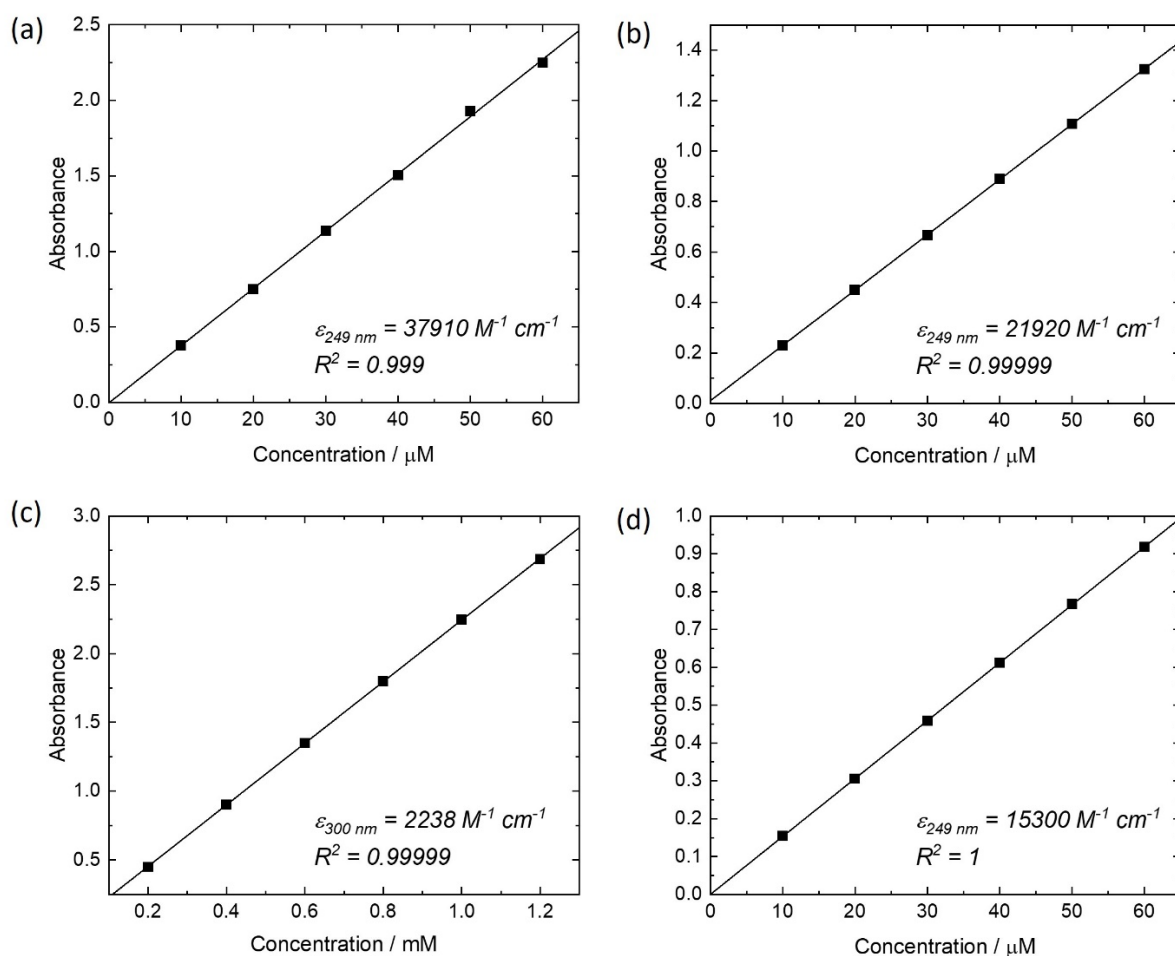

Figure S7: Absorbance in 1 M H<sub>2</sub>SO<sub>4</sub> vs concentration for (a) CPZ, (b) TMB, (c) NHPI and (d) VIO.

Table S2: Calculation of the concentration and volumetric energy density of saturated solutions

| <i>X</i> | S.E.                               | Abs   | Dilution Factor | $\epsilon$ / $\text{M}^{-1} \text{ cm}^{-1}$ | Max. Apparent Concentration / <i>M</i> | <i>n</i> | <i>E</i> / <i>V</i> | <i>E(V)</i> / <i>Wh L</i> <sup>-1</sup> | $\lambda$ / <i>nm</i> |
|----------|------------------------------------|-------|-----------------|----------------------------------------------|----------------------------------------|----------|---------------------|-----------------------------------------|-----------------------|
| CPZ      | 1 M H <sub>2</sub> SO <sub>4</sub> | 0.815 | 40000           | 37910                                        | 0.860                                  | 1        | 0.80                | 18.437                                  | 240                   |
| TMB      | 1 M H <sub>2</sub> SO <sub>4</sub> | 0.905 | 20000           | 21920                                        | 0.825                                  | 2        | 0.83                | 36.719                                  | 249                   |
|          | 6 M H <sub>2</sub> SO <sub>4</sub> | 0.373 | 100000          | 21920                                        | 1.702                                  | 2        | 0.83                | 75.730                                  |                       |
| NHPI     | 1 M H <sub>2</sub> SO <sub>4</sub> | 0.855 | 20              | 2238                                         | 0.008                                  | 1        | 1.34                | 0.274                                   | 300                   |
| VIO      | 1 M H <sub>2</sub> SO <sub>4</sub> | 0.250 | 2000            | 15300                                        | 0.033                                  | 1        | 1.16                | 1.016                                   | 249                   |

1. A. W. Lantz, S. A. Shavaliar, W. Schroeder and P. G. Rasmussen, *ACS Applied Energy Materials*, 2019, **2**, 7893-7902.
2. B. Yang, L. Hooper-Burkhardt, S. Krishnamoorthy, A. Murali, G. K. S. Prakash and S. R. Narayanan, *Journal of The Electrochemical Society*, 2016, **163**, A1442-A1449.
3. Y. Xu, Y. Wen, J. Cheng, Y. Yanga, Z. Xie and G. Cao, *WNWEC 2009 - 2009 World Non-Grid-Connected Wind Power and Energy Conference*, 2009, 475-478.
4. L. Hooper-Burkhardt, S. Krishnamoorthy, B. Yang, A. Murali, A. Nirmalchandar, G. K. S. Prakash and S. R. Narayanan, *Journal of The Electrochemical Society*, 2017, **164**, A600-A607.
5. Z.-c. Wu, Y. Awakura, S. Ando and H. Majima, *Materials Transactions, JIM*, 1990, **31**, 1065-1071.
6. M. C. Tucker, V. Srinivasan, P. N. Ross and A. Z. Weber, *Journal of Applied Electrochemistry*, 2013, **43**, 637-644.
7. X. You, Q. Ye and P. Cheng, *Journal of The Electrochemical Society*, 2017, **164**, E3386-E3394.
8. T. Yamamura, N. Watanabe, T. Yano and Y. Shiokawa, *Journal of The Electrochemical Society*, 2005, **152**, A830.
9. C. G. Cannon, P. A. A. Klusener, L. F. Petit, T. Wong, A. Wang, Q. Song, N. P. Brandon and A. R. J. Kucernak, *ACS Applied Energy Materials*, 2024, **7**, 2080-2087.
